# Supplementary material
Source: MDPI journal article supplement (https://www.mdpi.com/2311-5521/6/12/456)
Supplement: s1 [file s1]

**Table S1.** Characteristics of the surface layer of bottom sediments in the Norwegian and Barents Seas in different years of research.

| Areas                          | Stations  | n  | AHCs, µg/g |         | C <sub>org</sub> , % |         | Moisture, % |         |
|--------------------------------|-----------|----|------------|---------|----------------------|---------|-------------|---------|
|                                |           |    | interval   | average | interval             | average | interval    | average |
| August – September, 2016       |           |    |            |         |                      |         |             |         |
| All areas                      | 5405–5456 | 42 | 3–44       | 14      | 0.07–2.59            | 1.085   | 20.1–69.7   | 45.6    |
| Shtockman poligon              | 5413–5421 | 7  | 9–27       | 15      | 0.67–2.578           | 1.812   | 23.7–69.7   | 53.0    |
| Medvezhinsky Trough            | 5431–5441 | 10 | 6–44       | 17      | 0.25–1.71            | 0.791   | 27.0–58.5   | 40.6    |
| Russian Harbor                 | 5422–5430 | 7  | 4–22       | 11      | 0.242–1.860          | 0.960   | 27.9–60.0   | 40.1    |
| Svalbard - ZFI                 | 5447–5446 | 8  | 8–24       | 16      | 0.699–1.475          | 1.214   | 33.2–68.5   | 55.5    |
| July – August, 2017            |           |    |            |         |                      |         |             |         |
| All areas                      | 5516–5581 | 48 | 3–57       | 12      | 0.03–2.38            | 1.02    | 17.0–72.1   | 49.5    |
| Western part                   | 5516–5532 | 16 | 15–37      | 10      | 0.30–1.70            | 0.65    | 30.4–60.7   | 49.6    |
| Svalbard – ZFI                 | 5550–5564 | 14 | 4–37       | 13      | 0.72–2.38            | 1.52    | 37.6–72.0   | 54.3    |
| Novaya Zemlya                  | 5565–5569 | 5  | 6–57       | 19      | 0.80–1.66            | 1.19    | 40.5–63.4   | 49.8    |
| Central part                   | 5570–5581 | 13 | 4–17       | 10.8    | 0.032–1.94           | 0.93    | 17.0–63.4   | 49.1    |
| May –June, 2019                |           |    |            |         |                      |         |             |         |
| All areas                      | 6131–6217 | 49 | 6–64       | 25      | 0.05–1.87            | 0.83    | 17.1–72.6   | 56.0    |
| Mohns Ridge                    | 6131–6146 | 7  | 7–51       | 18      | 0.23–0.77            | 0.51    | 35.0–72.6   | 49.8    |
| Lofoten Basin                  | 6139–6142 | 4  | 6–28       | 17      | 0.49–0.69            | 0.58    | 65.2–72.6   | 68.5    |
| KnipovichRidge                 | 6150–6157 | 7  | 14–37      | 27      | 0.52–1.32            | 0.96    | 60.1–71.2   | 66.1    |
| Western shelf Svalbard         | 6152–6163 | 6  | 15–35      | 27      | 0.58–1.66            | 0.88    | 35.3–71.2   | 54.1    |
| Quaytol Trough                 | 6164–6172 | 5  | 7–59       | 23      | 0.47–0.80            | 0.63    | 34.1–61.0   | 47.2    |
| Meridional section<br>(27.5°N) | 6181–6196 | 6  | 28–53      | 40      | 1.31–1.87            | 1.70    | 50.0–76.2   | 64.3    |
| South section                  | 6197–6217 | 14 | 10–64      | 23      | 0.05–1.51            | 0.52    | 17.1–68.2   | 64.3    |
| July – August, 2020            |           |    |            |         |                      |         |             |         |
| All areas                      | 6821–6867 | 21 | 3–186      | 45      | 0.30–1.56            | 0.92    | 22.2–72.9   | 58.6    |
| Mohns Ridge                    | 6821–6838 | 7  | 3–27       | 14      | 0.30–0.51            | 0.44    | 38.5–61.5   | 49.9    |
| Sturford                       | 6840–6843 | 4  | 36–186     | 90      | 0.69–1.36            | 1.12    | 22.2–66.2   | 46.3    |
| Eastern shelf Svalbard         | 6844–6851 | 5  | 17–86      | 52      | 1.07–1.56            | 1.29    | 59.5–72.9   | 69.6    |

|            |           |   |       |    |           |      |           |      |
|------------|-----------|---|-------|----|-----------|------|-----------|------|
| Trough-ZFI | 6852–6867 | 5 | 17–30 | 25 | 0.68–0.87 | 0.83 | 67.6–69.6 | 68.6 |
|------------|-----------|---|-------|----|-----------|------|-----------|------|

**Table S2.** Concentrations of organic compounds in bottom sediments at individual stations and distribution of markers in the composition of PAHs

| Station            | Horizon | AHCs,<br>μg/g | C <sub>org</sub> ,<br>% | ΣPAH,<br>ng/g | %<br>ΣNAPH | FLT/<br>PYR | ΣNaph/<br>PHEN | (FLT+PYR)<br>)/(PHEN+<br>CHR) | PHEN/<br>ANTR | ANTR /<br>ANTR +<br>PHEN | BaA/<br>BaA+CH<br>R | FLT /<br>FLT+ PYR | BaP/<br>BaP+Be<br>P |
|--------------------|---------|---------------|-------------------------|---------------|------------|-------------|----------------|-------------------------------|---------------|--------------------------|---------------------|-------------------|---------------------|
| May –June 2019     |         |               |                         |               |            |             |                |                               |               |                          |                     |                   |                     |
| 6147               | 0-2     | 5             | 0.557                   | 291           | 21.5       | 2.68        | 0.31           | 0.29                          | 10.66         | 0.09                     | 0.18                | 0.73              | 0.35                |
|                    | 4-11    | 17            | 0.382                   | 264           | 24.2       | 2.65        | 0.43           | 0.25                          | 11.60         | 0.08                     | 0.21                | 0.73              | 0.37                |
|                    | 5-11    | 12            | 0.222                   | 314           | 5.6        | 2.31        | 0.53           | 0.38                          | 13.83         | 0.07                     | 0.25                | 0.70              | 0.32                |
| 6157               | 0-1     | 32            | 1.325                   | 376           | 6.4        | 2.61        | 0.36           | 0.27                          | 11.17         | 0.08                     | 0.31                | 0.72              | 0.31                |
|                    | 1-2     | 31            | 1.292                   | 422           | 20.7       | 2.03        | 0.25           | 0.42                          | 8.23          | 0.11                     | 0.09                | 0.67              | 0.37                |
| 6161               | 0-2     | 35            | 0.640                   | 1125          | 22.8       | 0.23        | 1.66           | 1.05                          | 8.53          | 0.10                     | 0.04                | 0.19              | 0.10                |
| 6163               | 0-2     | 35            | 1.665                   | 838           | 25.6       | 0.75        | 1.11           | 0.88                          | 6.46          | 0.13                     | 0.02                | 0.43              | 0.08                |
| 6164               | 0-2     | 15            | 0.625                   | 1456          | 8.3        | 0.46        | 0.49           | 1.92                          | 7.30          | 0.12                     | 0.02                | 0.32              | 0.06                |
| 6209               | 0-1     | 37            | 1.047                   | 290.6         | 12.9       | 2.68        | 0.31           | 0.29                          | 10.66         | 0.09                     | 0.18                | 0.73              | 0.35                |
|                    | 1-2     | 27            | 1.082                   | 263.8         | 16.9       | 2.65        | 0.43           | 0.25                          | 11.60         | 0.08                     | 0.21                | 0.73              | 0.37                |
|                    | 3-4     | 33            | 0.842                   | 313.6         | 18.3       | 2.31        | 0.53           | 0.38                          | 13.83         | 0.07                     | 0.25                | 0.70              | 0.32                |
|                    | 5-7     | 34            | 0.887                   | 376.1         | 15.5       | 2.61        | 0.36           | 0.27                          | 11.17         | 0.08                     | 0.31                | 0.72              | 0.31                |
|                    | 15-18   | 32            | 0.910                   | 422.5         | 12.2       | 2.03        | 0.25           | 0.42                          | 8.23          | 0.11                     | 0.09                | 0.67              | 0.37                |
| July – August 2020 |         |               |                         |               |            |             |                |                               |               |                          |                     |                   |                     |
| 6841               | 0-1     | 37            | 1.320                   | 800           | 20.0       | 2.07        | 0.63           | 0.28                          | 10.54         | 0.09                     | 0.28                | 0.67              | 0.15                |
|                    | 3-4     | 32            | 1.280                   | 2164          | 22.0       | 1.85        | 0.98           | 0.37                          | 16.69         | 0.06                     | 0.26                | 0.65              | 0.16                |
|                    | 5-6     | 25            | 1.417                   | 759           | 14.5       | 2.30        | 0.36           | 0.26                          | 8.75          | 0.10                     | 0.36                | 0.70              | 0.11                |
|                    | 7-8     | 26            | 1.470                   | 356           | 14.0       | 1.70        | 0.38           | 0.23                          | 7.64          | 0.12                     | 0.33                | 0.63              | 0.12                |
| 6842               | 0-1     | 186           | 1.357                   | 985           | 45.6       | 3.55        | 2.29           | 0.68                          | 42.68         | 0.02                     | 0.06                | 0.78              | 0.11                |
| 6845               | 0-1     | 183           | 1.564                   | 888           | 34.4       | 2.86        | 1.51           | 0.62                          | 21.56         | 0.04                     | 0.36                | 0.74              | 0.16                |
|                    | 1-2     | 210           | 1.582                   | 780           | 37.4       | 3.00        | 1.78           | 0.60                          | 24.85         | 0.04                     | 0.36                | 0.75              | 0.15                |
|                    | 2-3     | 176           | 1.737                   | 768           | 34.6       | 2.84        | 1.95           | 0.76                          | 21.68         | 0.04                     | 0.39                | 0.74              | 0.14                |
|                    | 3-4     | 15            | 1.812                   | 723           | 34.3       | 2.76        | 2.01           | 0.76                          | 18.95         | 0.05                     | 0.35                | 0.73              | 0.12                |
|                    | 4-5     | 180           | 1.820                   | 692           | 34.1       | 3.07        | 2.33           | 1.02                          | 26.63         | 0.04                     | 0.38                | 0.75              | 0.12                |
|                    | 5-6     | 76            | 1.717                   | 808           | 31.3       | 2.89        | 1.81           | 0.82                          | 19.65         | 0.05                     | 0.40                | 0.74              | 0.13                |
|                    | 6-7     | 68            | 2.014                   | 693           | 28.1       | 3.03        | 2.03           | 1.09                          | 32.07         | 0.03                     | 0.39                | 0.75              | 0.15                |
|                    | 7-8     | 166           | 1.812                   | 760           | 32.5       | 3.03        | 1.99           | 0.83                          | 21.40         | 0.04                     | 0.38                | 0.75              | 0.12                |
|                    | 8-9     | 53            | 1.790                   | 691           | 29.3       | 3.08        | 2.16           | 1.18                          | 26.80         | 0.04                     | 0.43                | 0.75              | 0.16                |
|                    | 9-10    | 32            | 1.697                   | 728           | 29.6       | 2.62        | 1.82           | 0.94                          | 20.48         | 0.05                     | 0.46                | 0.72              | 0.16                |
|                    | 10-13   | 33            | 1.647                   | 820           | 29.4       | 2.99        | 1.92           | 1.03                          | 29.19         | 0.03                     | 0.40                | 0.75              | 0.18                |
|                    | 13-16   | 35            | 1.695                   | 639           | 31.0       | 2.75        | 1.94           | 1.02                          | 29.97         | 0.03                     | 0.39                | 0.73              | 0.18                |
|                    | 16-19   | 26            | 1.595                   | 566           | 30.9       | 2.61        | 2.02           | 1.04                          | 39.36         | 0.02                     | 0.33                | 0.72              | 0.21                |
|                    | 19-22   | 27            | 1.525                   | 583           | 32.1       | 2.20        | 1.71           | 0.80                          | 23.83         | 0.04                     | 0.32                | 0.69              | 0.20                |
|                    | 22-25   | 16            | 1.542                   | 543           | 30.0       | 2.49        | 1.82           | 1.04                          | 33.22         | 0.03                     | 0.31                | 0.71              | 0.20                |
|                    | 25-26   | 23            | 1.600                   | 521           | 32.3       | 2.18        | 1.90           | 0.94                          | 42.05         | 0.02                     | 0.33                | 0.69              | 0.21                |

|      |       |    |       |      |      |      |      |      |       |      |      |      |      |
|------|-------|----|-------|------|------|------|------|------|-------|------|------|------|------|
| 6847 | 1-2   | 39 | 1.295 | 1011 | 19.3 | 1.61 | 0.77 | 0.22 | 10.94 | 0.08 | 0.36 | 0.62 | 0.14 |
|      | 5-6   | 43 | 1.127 | 992  | 19.3 | 1.04 | 0.65 | 0.20 | 8.70  | 0.10 | 0.20 | 0.51 | 0.14 |
|      | 24-27 | 71 | 1.130 | 1434 | 15.1 | 0.85 | 0.58 | 0.25 | 8.29  | 0.11 | 0.26 | 0.46 | 0.15 |
| 6850 | 0-1   | 40 | 1.070 | 2436 | 11.9 | 2.18 | 0.32 | 1.17 | 48.10 | 0.02 | 0.33 | 0.69 | 0.21 |
|      | 1-2   | 22 | 0.892 | 2978 | 9.1  | 2.01 | 0.28 | 1.57 | 39.36 | 0.02 | 0.52 | 0.67 | 0.26 |
|      | 2-3   | 28 | 1.022 | 1424 | 12.5 | 2.28 | 0.30 | 0.79 | 45.37 | 0.02 | 0.35 | 0.69 | 0.17 |
|      | 3-6   | 49 | 1.009 | 1112 | 15.6 | 2.46 | 0.39 | 0.68 | 13.11 | 0.07 | 0.33 | 0.71 | 0.14 |
|      | 6-9   | 34 | 1.142 | 833  | 21.7 | 2.65 | 0.58 | 0.49 | 11.44 | 0.08 | 0.32 | 0.73 | 0.09 |
|      | 9-12  | 30 | 1.092 | 973  | 17.8 | 2.22 | 0.44 | 0.58 | 13.70 | 0.07 | 0.30 | 0.69 | 0.10 |
|      | 12-15 | 33 | 2.107 | 2184 | 10.6 | 2.18 | 0.31 | 1.28 | 13.82 | 0.07 | 0.26 | 0.69 | 0.13 |
|      | 15-18 | 21 | 0.980 | 588  | 21.1 | 1.77 | 0.58 | 0.44 | 9.31  | 0.10 | 0.31 | 0.64 | 0.11 |
|      | 18-21 | 36 | 1.017 | 830  | 13.9 | 2.19 | 0.38 | 0.80 | 9.71  | 0.09 | 0.26 | 0.69 | 0.12 |
|      | 21-24 | 26 | 1.027 | 807  | 16.7 | 2.22 | 0.40 | 0.48 | 11.25 | 0.08 | 0.28 | 0.69 | 0.13 |
| 6864 | 21-27 | 56 | 1.045 | 1365 | 11.8 | 2.26 | 0.27 | 0.58 | 8.15  | 0.11 | 0.28 | 0.69 | 0.14 |
|      | 0-1   | 17 | 0.675 | 859  | 22.8 | 2.47 | 0.56 | 0.42 | 23.78 | 0.04 | 0.04 | 0.71 | 0.15 |
|      | 1-2   | 25 | 0.620 | 983  | 29.6 | 2.69 | 0.69 | 0.24 | 28.03 | 0.03 | 0.05 | 0.73 | 0.13 |
|      | 2-3   | 23 | 0.615 | 845  | 33.6 | 3.02 | 0.81 | 0.16 | 17.80 | 0.05 | 0.09 | 0.75 | 0.11 |
|      | 3-4   | 21 | 0.580 | 736  | 36.3 | 2.63 | 0.92 | 0.16 | 25.31 | 0.04 | 0.11 | 0.72 | 0.12 |
|      | 4-7   | 19 | 0.600 | 776  | 31.4 | 2.43 | 0.72 | 0.17 | 22.98 | 0.04 | 0.08 | 0.71 | 0.14 |
|      | 7-10  | 26 | 0.577 | 749  | 32.1 | 2.81 | 0.72 | 0.16 | 18.30 | 0.05 | 0.10 | 0.74 | 0.17 |
|      | 10-13 | 21 | 0.552 | 758  | 30.2 | 2.50 | 0.67 | 0.22 | 21.40 | 0.04 | 0.04 | 0.71 | 0.14 |
|      | 13-16 | 20 | 0.485 | 865  | 25.9 | 2.65 | 0.51 | 0.18 | 14.82 | 0.06 | 0.03 | 0.73 | 0.09 |
|      | 16-19 | 37 | 0.457 | 706  | 35.9 | 2.10 | 0.84 | 0.12 | 20.24 | 0.05 | 0.12 | 0.68 | 0.10 |
|      | 19-21 | 19 | 0.450 | 677  | 45.1 | 1.40 | 1.46 | 0.10 | 18.03 | 0.05 | 0.17 | 0.58 | 0.13 |
|      | 21-24 | 29 | 0.492 | 913  | 36.7 | 2.32 | 0.96 | 0.13 | 13.85 | 0.07 | 0.16 | 0.70 | 0.15 |
|      | 24-26 | 21 | 0.465 | 1322 | 34.8 | 2.43 | 0.92 | 0.34 | 11.41 | 0.08 | 0.19 | 0.71 | 0.16 |
